# Supplementary material for: BMI is Strongly Associated With Hypertension, and Waist Circumference is Strongly Associated With Type 2 Diabetes and Dyslipidemia, in Northern Chinese Adults
Source: PubMed Central journal article supplement (PMC3798650; doi:10.2188/jea.je20110120), 2012-07-05
Supplement: je-22-317-s001.pdf [file je-22-317-s001.pdf]

Table S1. Sensitivity, specificity, and area under the curve (AUC) for cut-off values of anthropometric indices to identify obesity-related chronic diseases in participants with BMI <30 kg/m<sup>2</sup>

| Sex   | Disease             | Optimal index | Cut-off | Sensitivity (%) | Specificity (%) | Youden index | AUC (95% CI)    |
|-------|---------------------|---------------|---------|-----------------|-----------------|--------------|-----------------|
| Men   | ≥ 2 metabolic risks | WC            | 87.05   | 70.03           | 66.31           | 36.34        | 0.77(0.76,0.79) |
|       | ≥ 2 metabolic risks | BMI           | 24.63   | 70.69           | 64.33           | 35.02        | 0.76(0.75,0.78) |
|       | T2DM                | WC            | 87.05   | 72.61           | 50.44           | 23.05        | 0.64(0.61,0.66) |
|       | Dyslipidemia        | WC            | 88.95   | 63.61           | 60.21           | 23.82        | 0.62(0.60,0.64) |
|       | Hypertension        | BMI           | 24.59   | 70.48           | 58.58           | 29.06        | 0.66(0.64,0.68) |
| Women | ≥ 2 metabolic risks | WC            | 78.45   | 73.72           | 62.91           | 36.63        | 0.74(0.73,0.78) |
|       | ≥ 2 metabolic risks | BMI           | 24.20   | 75.47           | 61.29           | 36.76        | 0.70(0.69,0.73) |
|       | T2DM                | WC            | 83.85   | 61.34           | 67.15           | 28.49        | 0.69(0.67,0.71) |
|       | Dyslipidemia        | WC            | 81.35   | 60.52           | 61.47           | 21.99        | 0.67(0.66,0.69) |
|       | Hypertension        | BMI           | 24.58   | 71.09           | 63.13           | 34.22        | 0.69(0.67,0.70) |

Abbreviations: BMI, body mass index; WC, waist circumference; T2DM, type 2 diabetes mellitus.

Table S2. Sensitivity, specificity, and area under the curve (AUC) for cut-off values of anthropometric indices to identify obesity-related chronic diseases in participants aged  $\geq 50$  and  $< 50$  years

| Sex                      | Disease                  | Optimal index            | Cut-off | Sensitivity (%) | Specificity (%) | Youden index | AUC (95% CI)    |                 |
|--------------------------|--------------------------|--------------------------|---------|-----------------|-----------------|--------------|-----------------|-----------------|
| Men                      | <50 years                |                          |         |                 |                 |              |                 |                 |
|                          | $\geq 2$ metabolic risks | WC                       | 86.45   | 69.72           | 63.33           | 33.05        | 0.70(0.68,0.73) |                 |
|                          | $\geq 2$ metabolic risks | BMI                      | 24.72   | 76.21           | 63.62           | 39.83        | 0.69(0.66,0.71) |                 |
|                          | T2DM                     | WC                       | 87.05   | 68.74           | 58.91           | 27.65        | 0.64(0.60,0.69) |                 |
|                          | Dyslipidemia             | WC                       | 88.65   | 63.86           | 63.80           | 27.66        | 0.63(0.60,0.66) |                 |
|                          | Hypertension             | BMI                      | 24.86   | 64.64           | 62.16           | 26.80        | 0.67(0.64,0.70) |                 |
|                          | >=50 years               |                          |         |                 |                 |              |                 |                 |
|                          | $\geq 2$ metabolic risks | WC                       | 88.70   | 73.67           | 59.41           | 33.08        | 0.69(0.65,0.69) |                 |
|                          | $\geq 2$ metabolic risks | BMI                      | 25.71   | 69.77           | 63.52           | 33.29        | 0.68(0.65,0.68) |                 |
|                          | T2DM                     | WC                       | 89.05   | 77.23           | 44.25           | 21.48        | 0.63(0.59,0.66) |                 |
|                          | Dyslipidemia             | WC                       | 89.95   | 63.87           | 62.87           | 26.74        | 0.60(0.58,0.64) |                 |
|                          | Hypertension             | BMI                      | 24.60   | 73.85           | 57.20           | 31.05        | 0.64(0.62,0.67) |                 |
|                          | Women                    | < 50 years               |         |                 |                 |              |                 |                 |
|                          |                          | $\geq 2$ metabolic risks | WC      | 76.85           | 65.28           | 64.92        | 30.20           | 0.70(0.67,0.72) |
| $\geq 2$ metabolic risks |                          | BMI                      | 24.12   | 66.14           | 67.25           | 33.39        | 0.70(0.66,0.71) |                 |
| T2DM                     |                          | WC                       | 81.35   | 64.43           | 66.89           | 31.32        | 0.68(0.64,0.72) |                 |
| Dyslipidemia             |                          | WC                       | 81.05   | 60.45           | 67.56           | 28.15        | 0.54(0.52,0.57) |                 |
| Hypertension             |                          | BMI                      | 24.30   | 72.75           | 67.53           | 40.31        | 0.74(0.72,0.77) |                 |
| >=50 years               |                          |                          |         |                 |                 |              |                 |                 |
| $\geq 2$ metabolic risks |                          | WC                       | 81.15   | 69.46           | 65.97           | 35.43        | 0.68(0.66,0.69) |                 |
| $\geq 2$ metabolic risks |                          | BMI                      | 25.14   | 63.75           | 69.23           | 32.98        | 0.67(0.65,0.69) |                 |
| T2DM                     |                          | WC                       | 83.85   | 70.34           | 50.09           | 20.43        | 0.64(0.62,0.67) |                 |
| Dyslipidemia             |                          | WC                       | 83.15   | 59.76           | 62.08           | 21.84        | 0.57(0.55,0.59) |                 |
| Hypertension             |                          | BMI                      | 24.82   | 69.64           | 69.76           | 39.40        | 0.67(0.65,0.69) |                 |

BMI, body mass index; WC, waist circumference; T2DM, type 2 diabetes mellitus.
