# Supplementary material for: BMI is Strongly Associated With Hypertension, and Waist Circumference is Strongly Associated With Type 2 Diabetes and Dyslipidemia, in Northern Chinese Adults
Source: PubMed Central journal article supplement (PMC3798650; doi:10.2188/jea.je20110120), 2012-07-05
Supplement: je-22-317-s002.pdf [file je-22-317-s002.pdf]

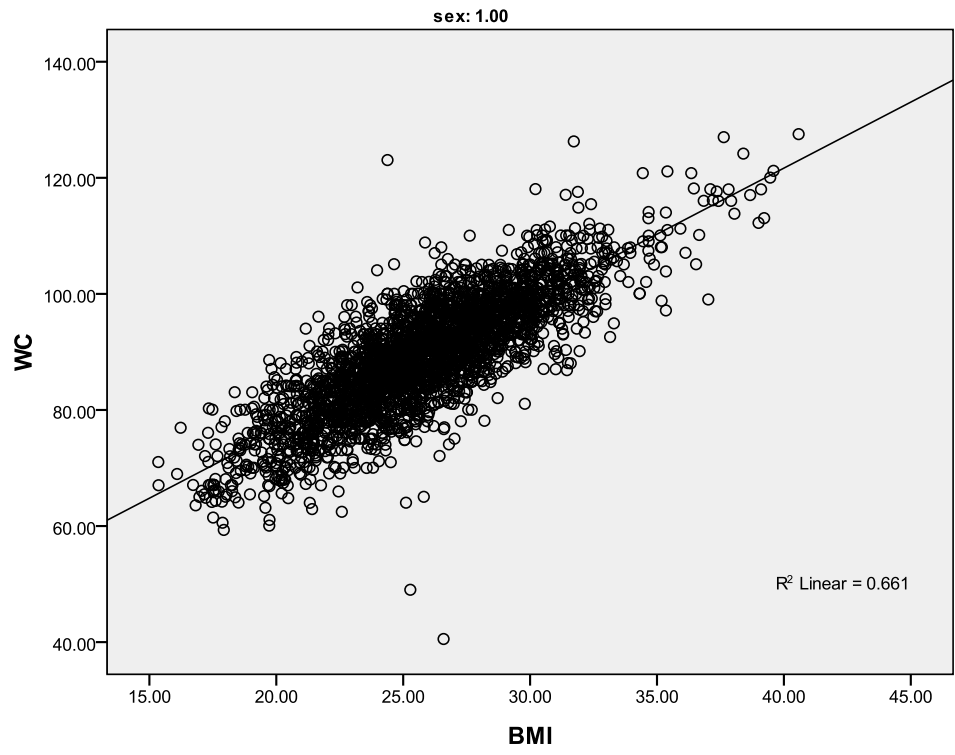

A

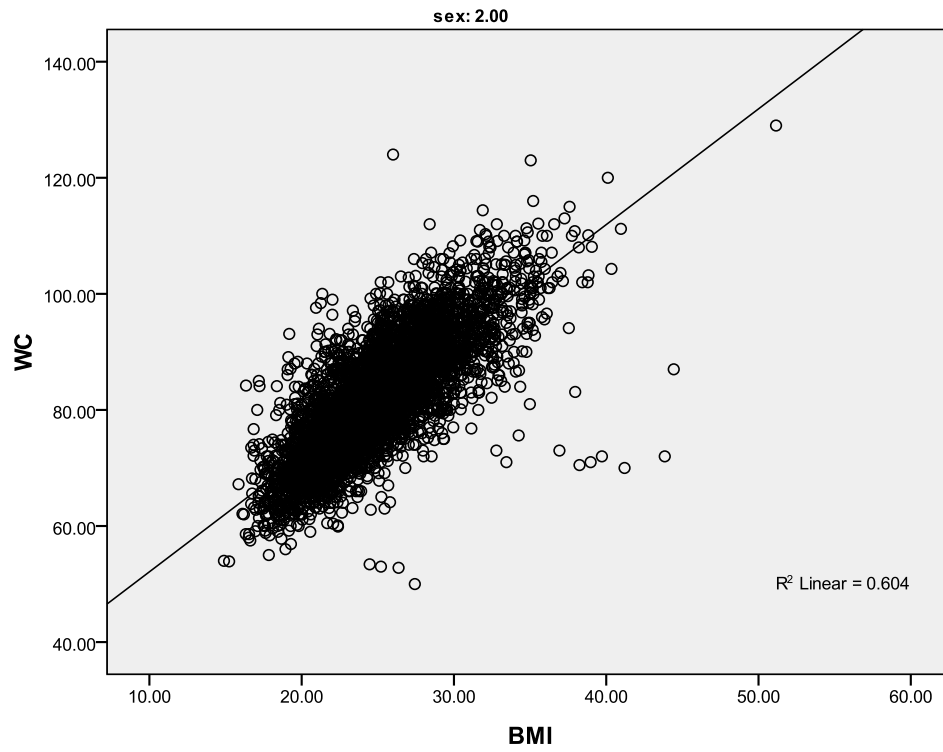

B

Figure S1. Correlation between waist circumference (WC) and body mass index (BMI) (A: men,  $r=0.813$ ,  $P<0.001$ ; B: women,  $r=0.777$ ,  $P<0.001$ ).
